# Supplementary material for: Ion Therapy: A Novel Strategy for Acute Myocardial Infarction
Source: PubMed Central journal article supplement (PMC6325593; doi:10.1002/advs.201801260), 2018-11-08
Supplement: ADVS-6-1801260-s001.pdf [file ADVS-6-1801260-s001.pdf]

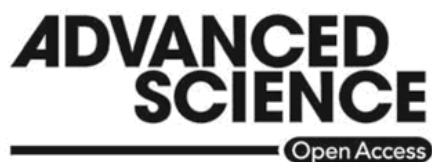

## Supporting Information

for *Adv. Sci.*, DOI: 10.1002/adv.201801260

### Ion Therapy: A Novel Strategy for Acute Myocardial Infarction

*Min Yi, Hekai Li, Xiaoya Wang, Jianyun Yan, Long Gao, Yinyan He, Xinglong Zhong, Yanbin Cai, Weijing Feng, Zhanpeng Wen, Chengtie Wu, Caiwen Ou,\* Jiang Chang,\* and Minsheng Chen\**

## Supporting Information

**Table S1** Primers sequences used for Q-RT-PCR.

| <b>Target genes</b>       | <b>Forward primer sequence (5' -3')</b> | <b>Reverse primer sequence (5' -3')</b> |
|---------------------------|-----------------------------------------|-----------------------------------------|
| Rat Cx43                  | GAGTCGCATTGGGTGAACATAGA                 | GTAGACCAGGGAAGCTTACCTG                  |
| Human VEGF <sub>165</sub> | TGCGGATCAAACCTCACCA                     | CAGGGATTTTTCTTGTCTTGCT                  |
| Human KDR                 | GTTCTTTCCACCAGCAGGAAG                   | TCTAAACCCATGGTGAGACCC                   |
| Rat VEGFA                 | TTCCTGTAGACACACCCACC3                   | TCCTCCCAACTCAAGTCCAC                    |
| Rat cTnT                  | GGGCTGAACAGCAGCGTAT                     | CCACTCTTCCGCTCTGTCTG                    |
| Rat Myh6                  | GACAATCTACAGCGGGTGAAGC                  | TGGCTCGCTGTGTGGTGAA                     |
| Rat GAPDH                 | GGCATCGTGGAAGGGCTCAT                    | GGGATGACCTTGCCCACAG                     |
| Human GAPDH               | ACGGATTTGGTCGTATTGGGCG                  | CTCCTGGAAGATGGTGATGG                    |

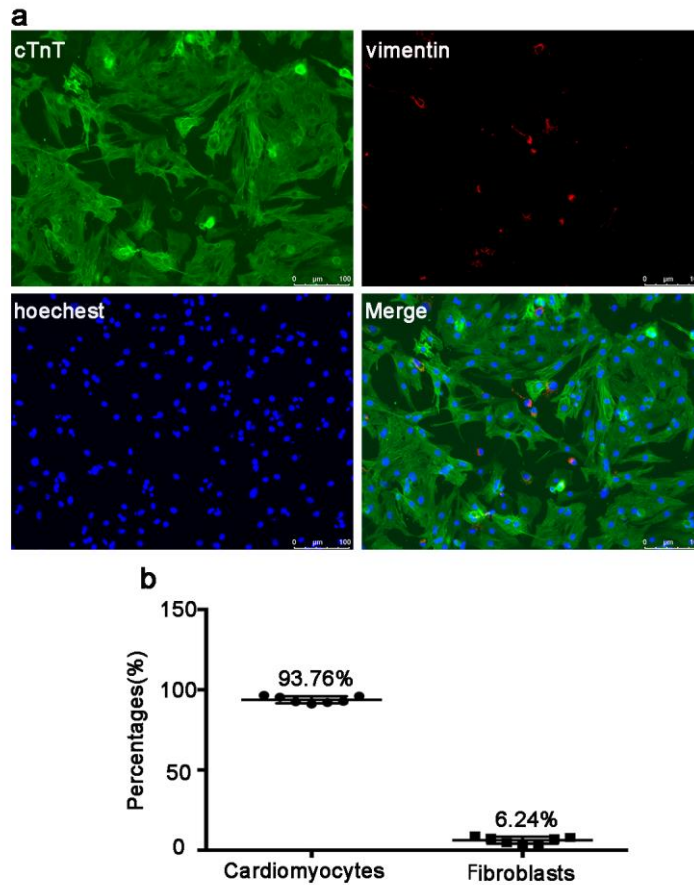

**Fig.S1 Percentages of NRCMs in the isolated primary cells.** (a) Immunofluorescence images of cTnT (green, cardiomyocyte specific maker) and vimentin (red, fibroblast specific maker) staining. (b) Quantitative analysis of NRCMs percentages in the isolated primary cells (n=5).

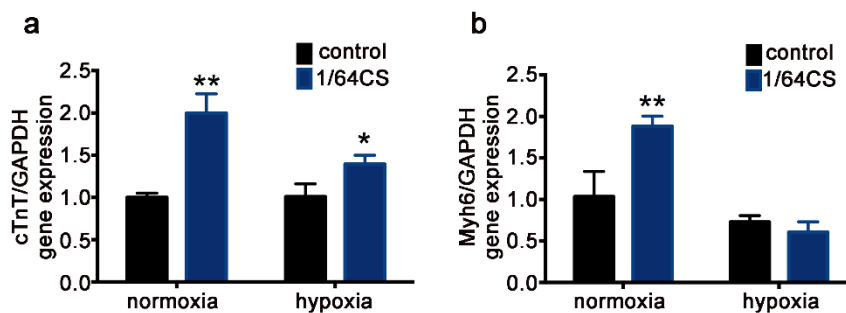

**Fig.S2 Effect of silicon-enriched ion extracts on the expression of cardiomyocyte specific marker genes under normoxia and glucose/oxygen deprived conditions in vitro.** (a) Expression of cardiomyocyte specific marker gene cTnT under normoxia (cultured for 5 days) and glucose/oxygen deprived conditions (cultured for 120min) in vitro. (b) Expression of cardiomyocyte specific marker gene Myh6 under normoxia (cultured for 5 days) and glucose/oxygen deprived conditions (cultured for 120min) in vitro; \* $p < 0.05$  and

**\*\* $p < 0.01$  vs. control.** Data are obtained from three independent experiments; mean  $\pm$  SD.

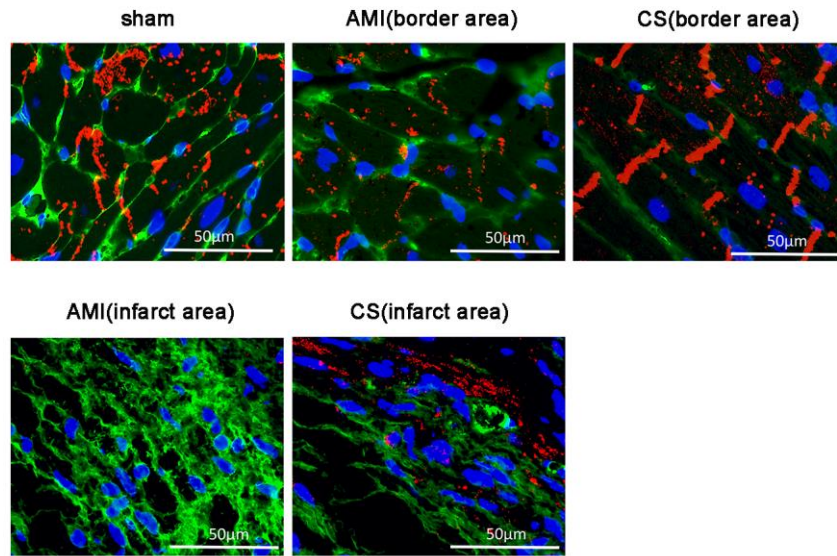

**Fig.S3** Gap junction associated Cx43 and Myh6 immunofluorescence staining in cardiomyocytes in **vivo**. Representative immunofluorescence images of Myh6 (green) and gap junction associated Cx43 (red) staining in the infarcted myocardium 4 weeks after surgery; scale bars represent 50  $\mu$ m.

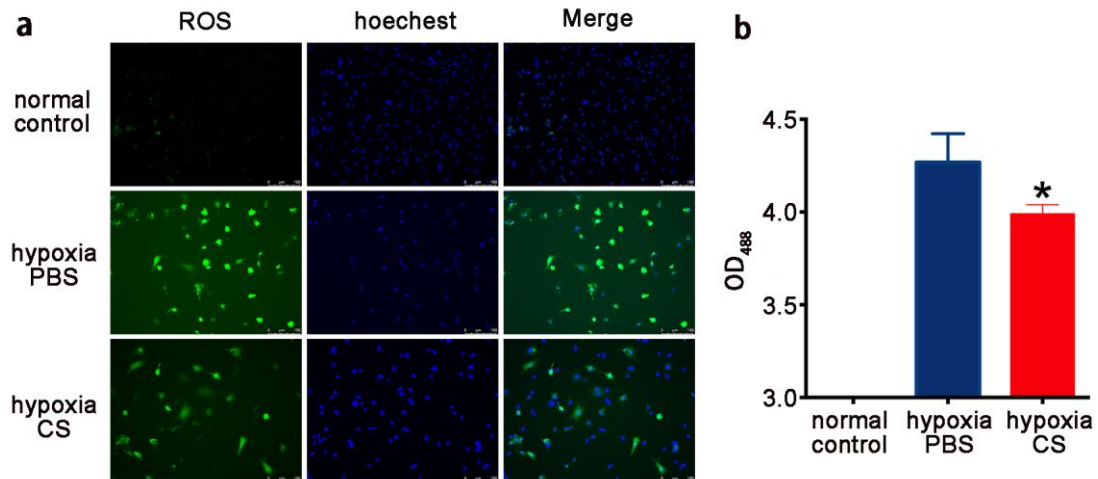

**Fig.S4** Effect of silicon-enriched ion extract on ROS levels of NRCMs under normal and glucose/oxygen deprived conditions **in vitro**. (a) Representative ROS staining examined by DCFH-DA. Normal control means normal oxygen. (b) Quantitative analysis of fluorescence intensity; \* $P < 0.05$  vs. PBS.

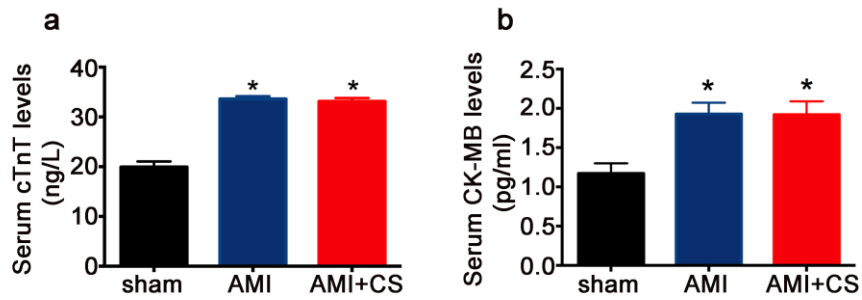

**Fig.S5 Cardiac enzymatic expression before “ion therapy” in vivo.** (a) Serum expression of cTnT levels in each groups before “ion therapy”. (b) Serum expression of CK-MB levels in each groups before “ion therapy”. Sham group n=3; AMI group n=6 and AMI+CS group n=6. \*  $p < 0.05$  vs. sham group; mean  $\pm$  SD.

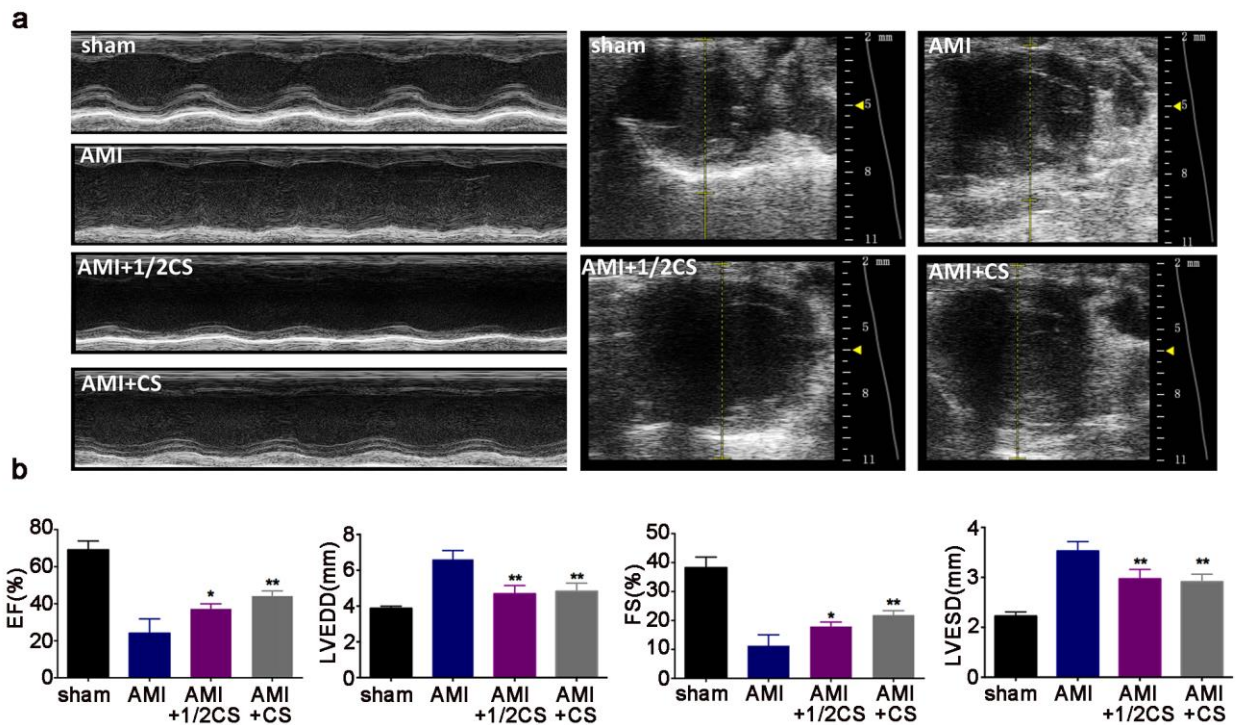

**Fig.S6 Effect of “ion therapy” of different concentrations on cardiac function post AMI in vivo.** (a) Representative echocardiograms (left) and measurements of different groups (right) were uniformly obtained from the mid-papillary muscle region of the left ventricle (LV) of each groups post “ion therapy” (4 weeks after LAD surgery). (b) Cardiac function measured by left ventricular end-diastolic diameter (LVEDD), LV end-systolic diameter (LVESD), the percentage of LV ejection fraction (EF) and fractional shortening (FS) values. \* $P < 0.05$  vs. AMI group, \*\* $P < 0.01$  vs. AMI group. Sham group n=3; AMI group n=3; AMI+1/2CS 1

group n=3 and AMI+ CS group n=3; mean  $\pm$  SD.

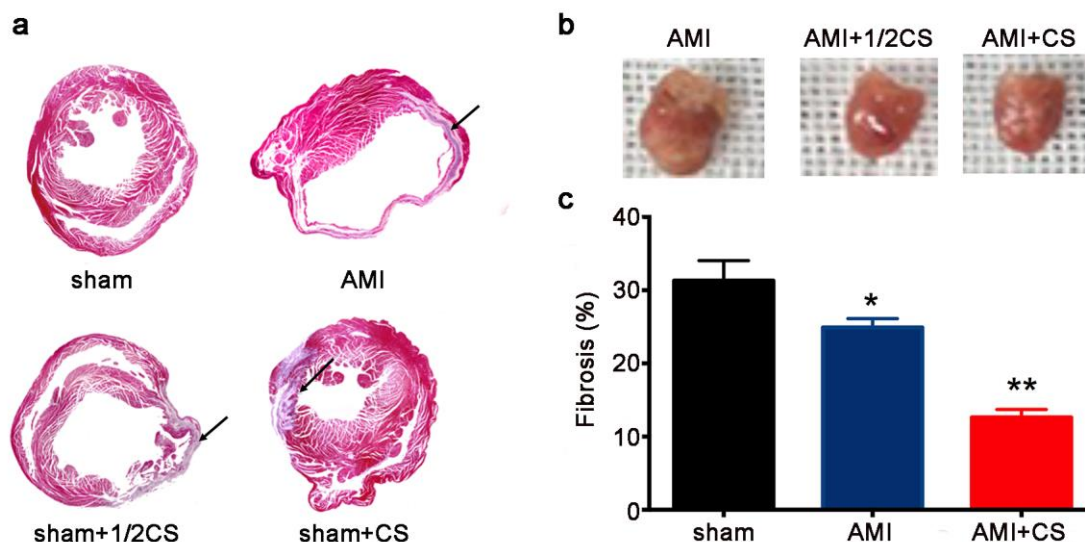

**Fig.S7 Effect of “ion therapy” of different concentrations on heart remodeling as well as hypertrophy post AMI in vivo.** (a) Representative Masson's trichrome staining of heart sections evaluating collagen deposition 4 weeks after surgery. (c) Quantitative analysis of the area of fibrosis. Sham group was set as 0% and  $^{\#}P < 0.001$  vs. AMI group (5 pictures for each group). (b) Representative pictures of heart samples indicating hypertrophy degrees.  $^*P < 0.05$  vs. AMI group,  $^{**}P < 0.01$  vs. AMI group. Sham group n=3; AMI group n=3; AMI+1/2CS1 group n=3 and AMI+ CS group n=3; mean  $\pm$  SD.

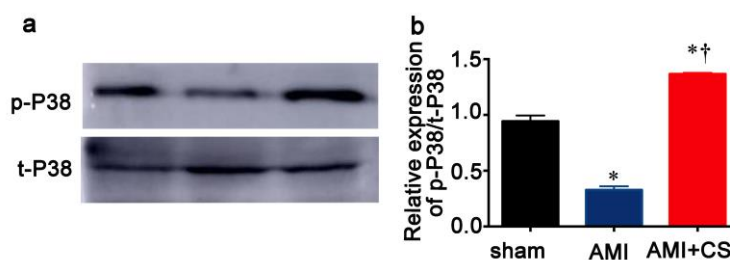

**Fig.S8 Effect of “ion therapy” on the expression of P38 protein in the border area of infarcted myocardium.** (a) Expression of phosphorylated P38 under “ion therapy” in the border area of infarcted myocardium. (b) Quantification of bands by densitometry. Data are obtained from three independent experiments;  $^*p < 0.01$  vs. sham,  $^{\dagger}p < 0.01$  vs. AMI; mean  $\pm$  SD.

## Text and graphic for Table of Contents

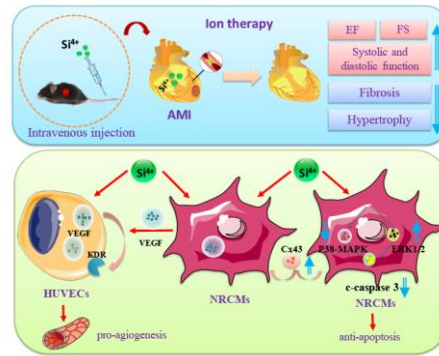

**“Ion therapy”**, a novel strategy for treatment of acute myocardial infarction (AMI) by intravenous injection of bioactive silicon (Si) ions released from silicate bioceramics, can improve cardiac function by promoting cell-cell communication, enhancing gap junction associated Cx43 expression, stimulating VEGF mediated angiogenesis and blood vessel formation, and inhibiting the MAPK family protein-associated apoptosis.
